# Supplementary material
Source: PubMed Central journal article supplement (PMC3839042)

## Novel Interactions of the TRTK12 Peptide with S100 Protein Family Members: Specificity and Thermodynamic Characterization.

*Lucas N. Wafer, Franco O. Tzul, Pranav P. Pandharipande, George I. Makhatadze*

### Supplementary Information

**Figure S1:** Representative EDTA-induced peptide dissociation kinetic traces. S100B-WT peptide dissociation at 35 °C in no salt (circles)  $86 \pm 8 \text{ s}^{-1}$  and with 150 mM NaCl added to buffer (triangles)  $73 \pm 5 \text{ s}^{-1}$ . Solid and dashed lines are single exponential fits to the data as described by Eq. 9. The  $K_d$  value measure in no salt,  $1.7 \pm 0.1 \text{ } \mu\text{M}$ , was within error of that measured in 150 mM NaCl,  $2.0 \pm 1.0 \text{ } \mu\text{M}$ .

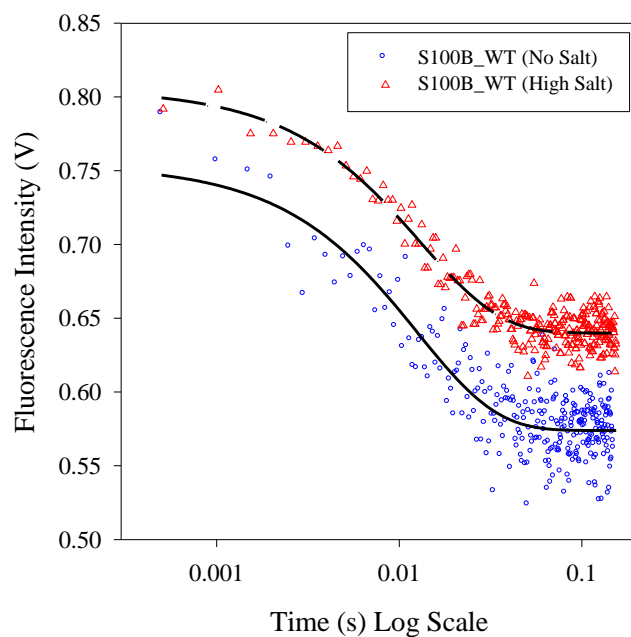

**Figure S2:** Example data of a fluorescence anisotropy experiment. Raw anisotropy values (●) as a function of the molar ratio of protein to peptide and the fit to the experimental data using Eq. 3 (—) for binding of TRTK12 to S100B at 25 °C.

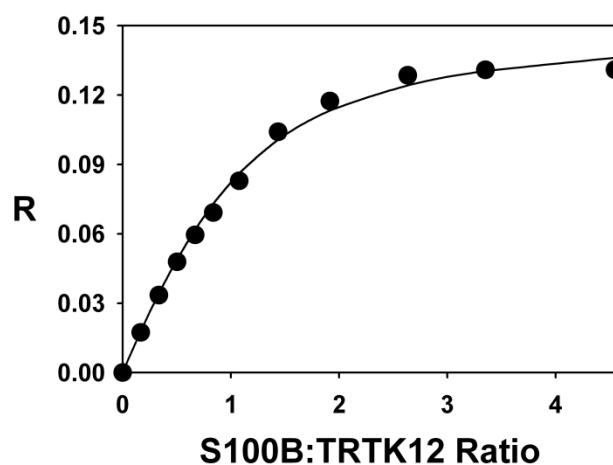

**Figure S3:** Dynamic quenching of tryptophan (W7) fluorescence using acrylamide for free TRTK12 (black circles), the S100B-TRTK12 complex (gray, upside-down triangles), the S100A2-TRTK12 complex (gray squares), and the S100P-TRTKWT (gray diamonds) in the presence of 5 mM calcium chloride.

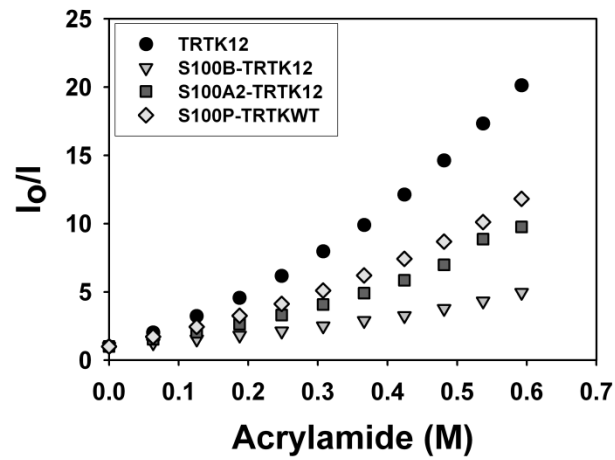

Supplement: NIHMS513191-supplement-1_si_001.pdf [file NIHMS513191-supplement-1_si_001.pdf]
